# Supplementary material
Source: PubMed Central journal article supplement (PMC6366555)
Supplement: NIHMS80430-supplement-Supplementary_Materials.pdf [file NIHMS80430-supplement-Supplementary_Materials.pdf]

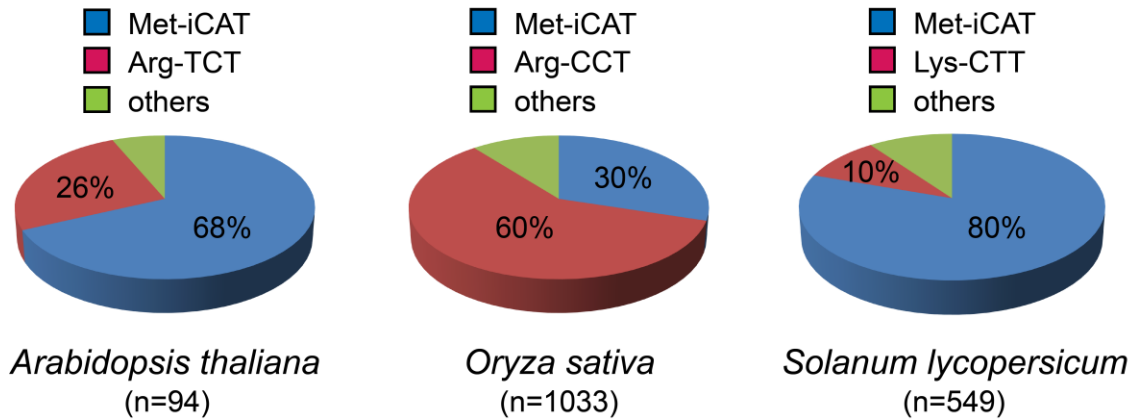

1

2 **Supplementary Figure 1.** PBS sequences of LTR retrotransposons in *Arabidopsis*, rice and  
 3 tomato

4 The frequency of tRNAs used for targeting PBS. LTR retrotransposons were annotated by  
 5 *LTRpred* (<http://github.com/HajkD/ALE>) and selected for young elements by filtering LTR  
 6 similarities higher than 95%. The total numbers of retrotransposons analysed in each  
 7 species are shown below the plots.

8

**a**

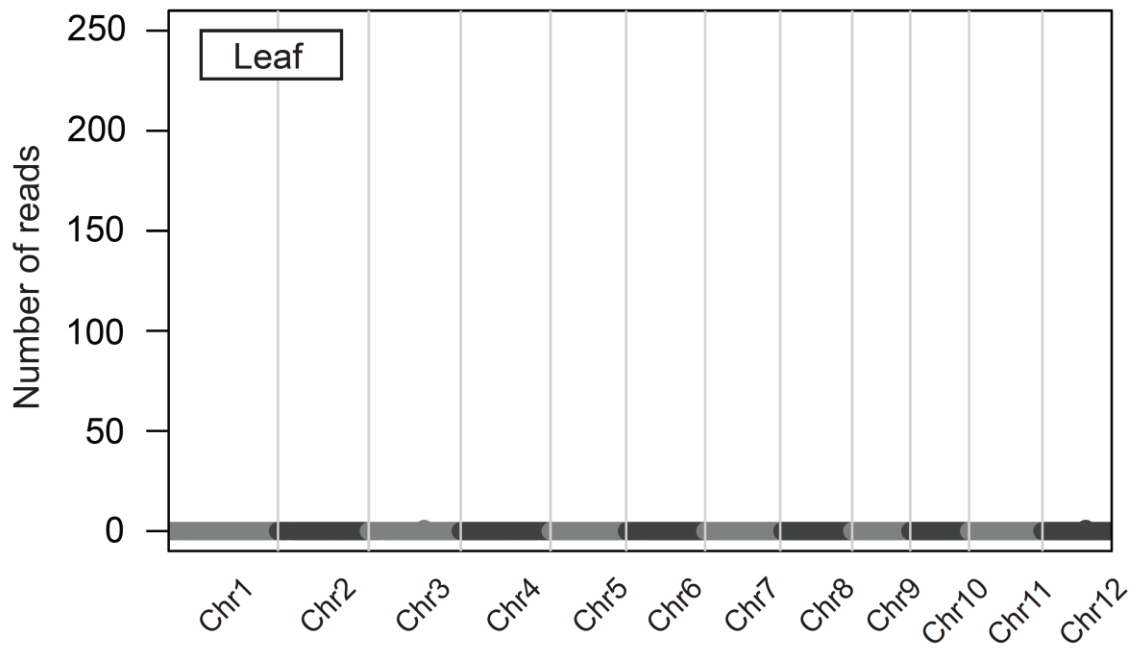

**b**

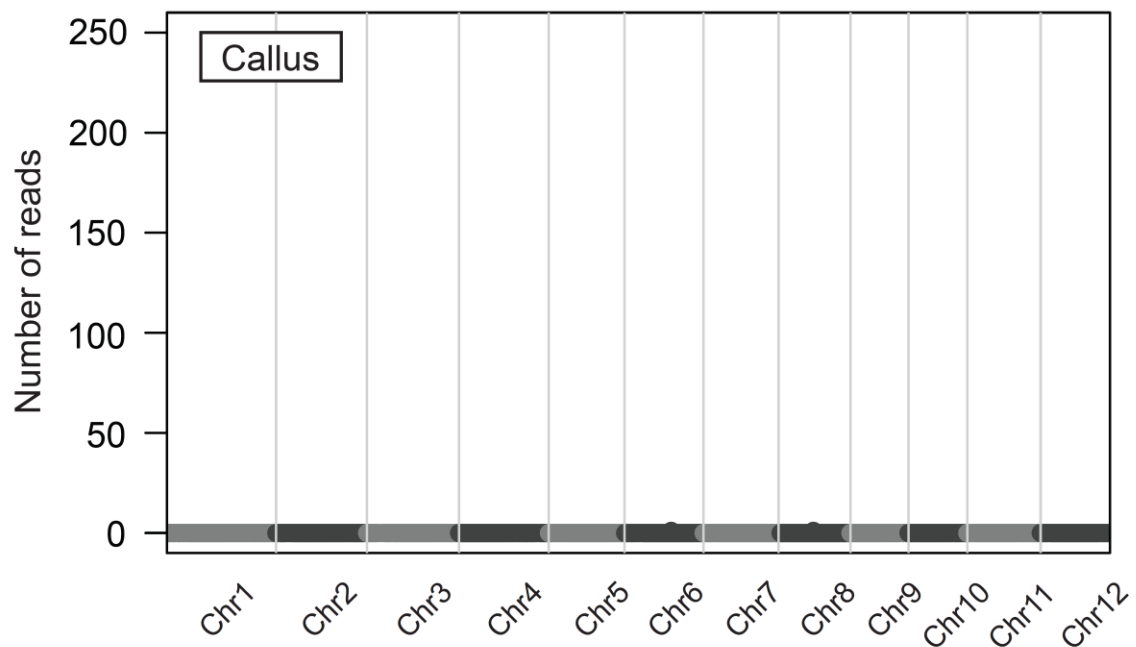

9

10 **Supplementary Figure 2.** SIRT results from leaves and calli of rice

11 **a** and **b**, Genome-wide plots for SIRT performed in leaves (**a**) and in calli (**b**) of rice.

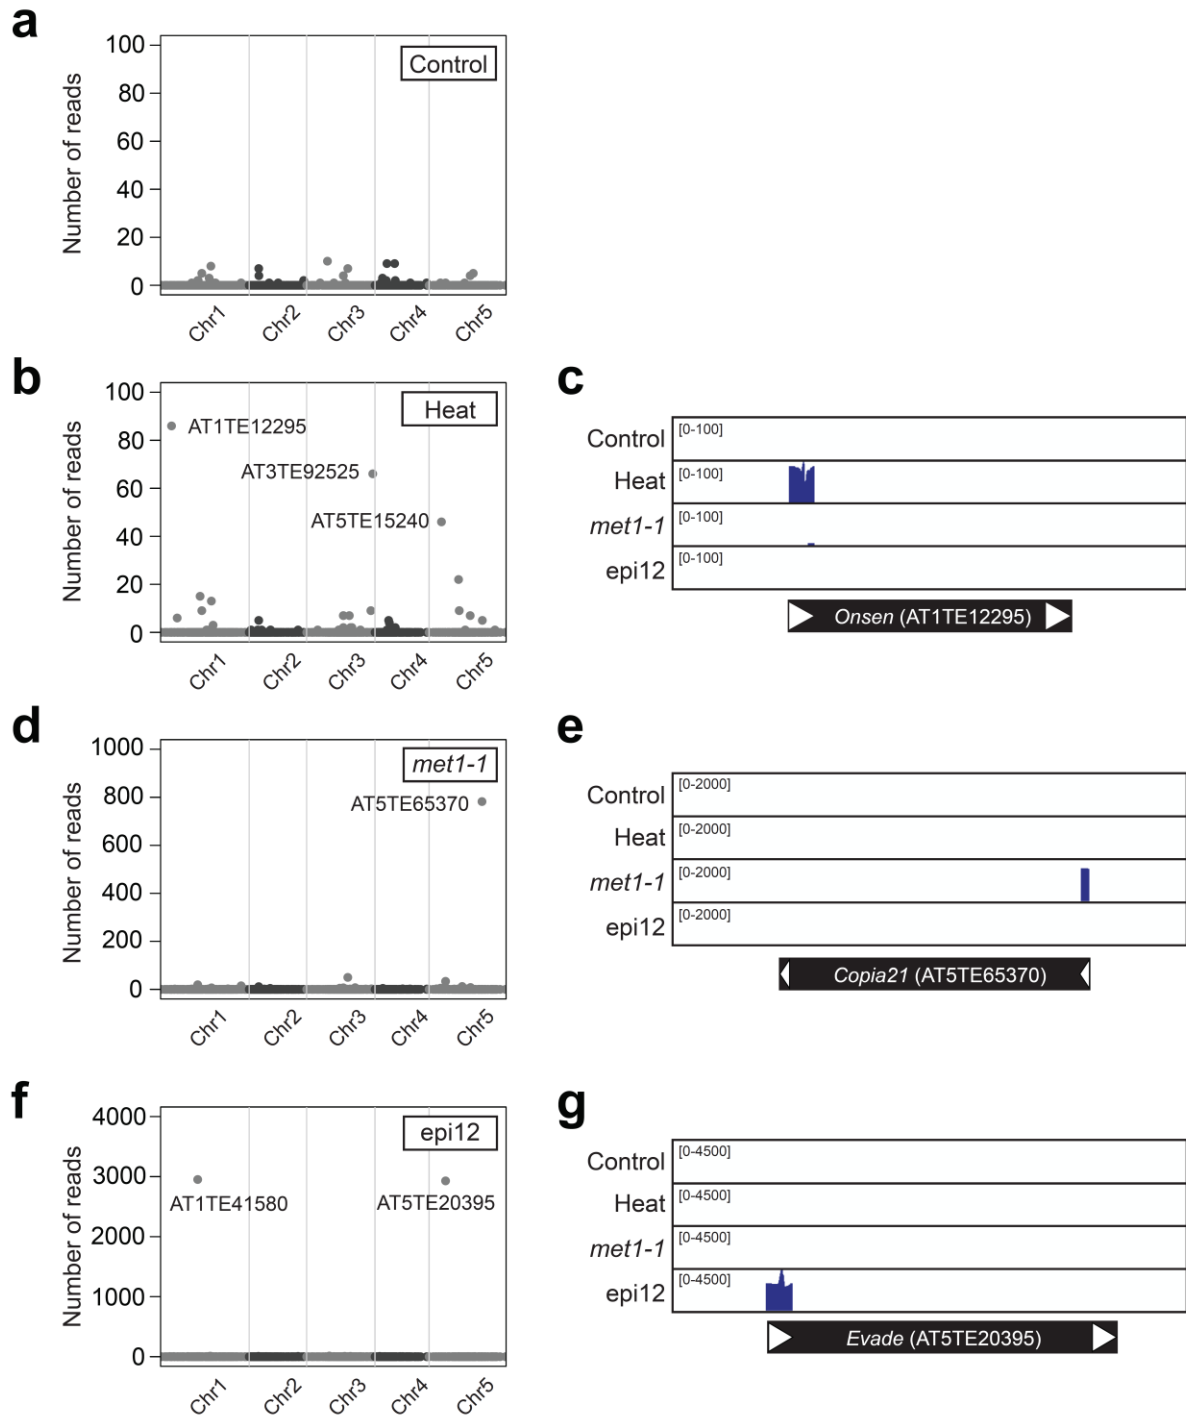

12

13 **Supplementary Figure 3. ALE-seq detection of eclDNAs of *Arabidopsis* retrotransposons**

14 Genome-wide plots (**a**, **b**, **d** and **f**) and read coverage plots (**c**, **e** and **g**) for ALE-seq profiles of  
 15 *Arabidopsis* Col-0 wt (**a**), heat-stressed Col-0 (**b** and **c**), *met1-1* (**d** and **e**), and *epi12* (**f** and **g**).

16

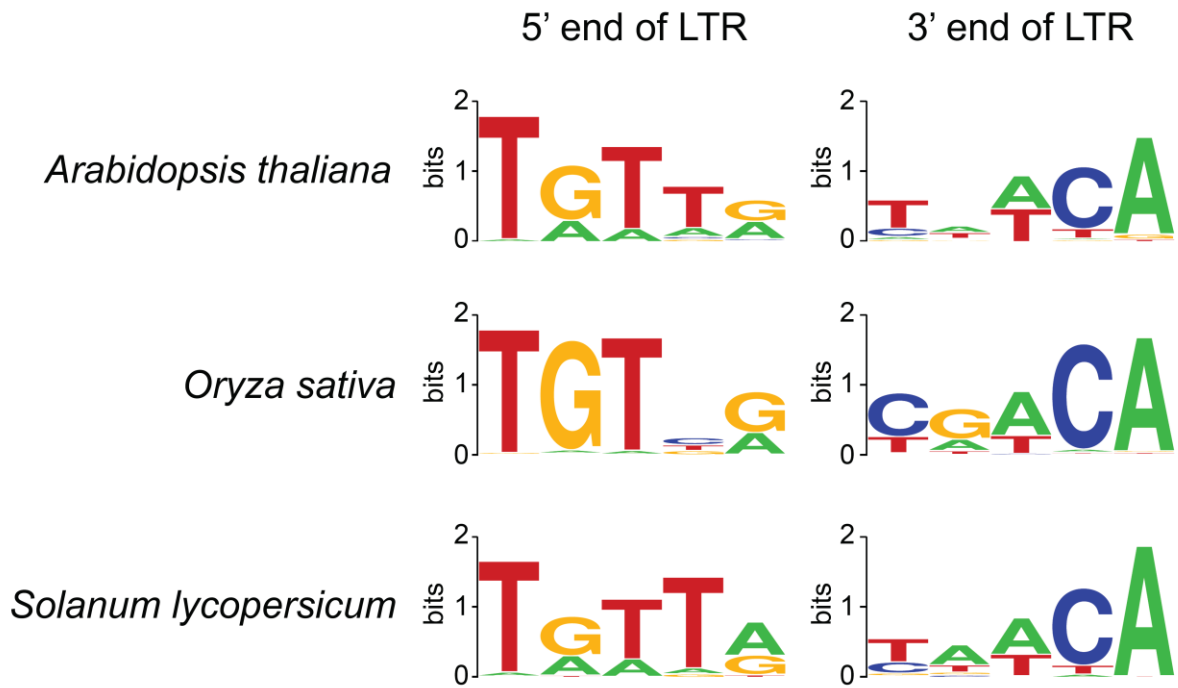

17

18 **Supplementary Figure 4.** Conservation of end sequences of LTR

19 The conserved sequences of 5' and 3' ends of LTR. The first and last five nucleotides of LTRs  
 20 are displayed. The images were generated by the WebLogo tool  
 21 (<http://weblogo.berkeley.edu/logo.cgi>).

22

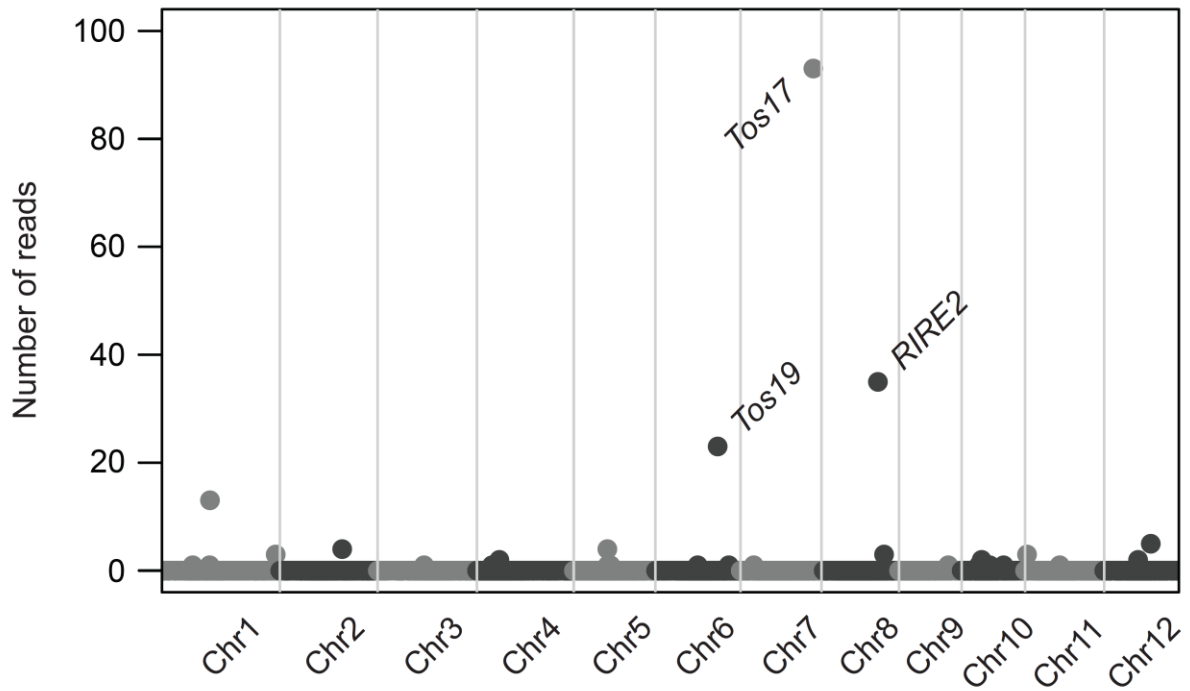

23

24 **Supplementary Figure 5.** ALE-seq detection of eLDNAs of rice retrotransposons using  
 25 multiplexed PBS primers

26 Genome-wide plot for ALE-seq profiles of rice callus using pooled PBS primers of Met-iCAT  
 27 and Arg-CCT.

28

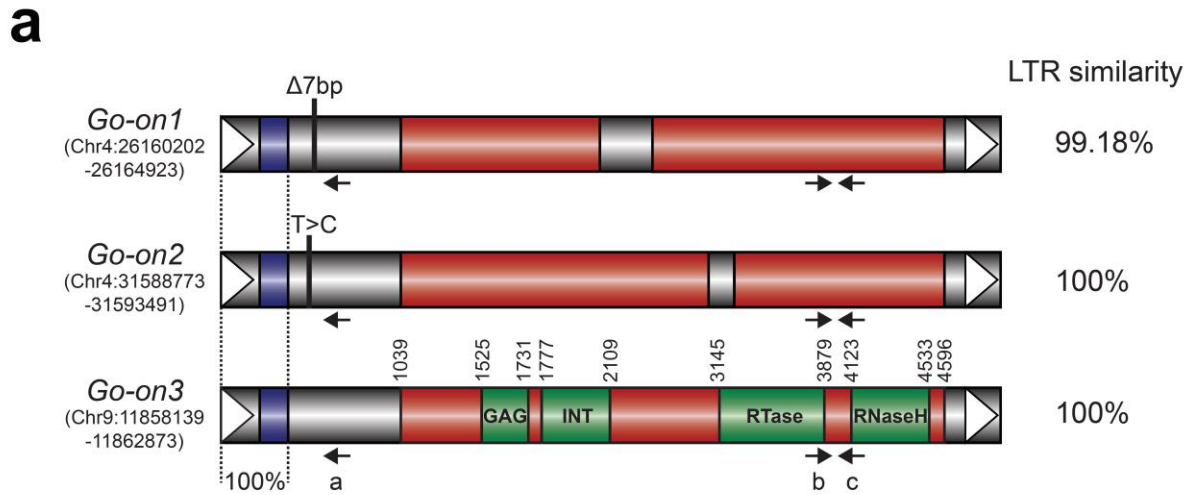

**b**

```

Go-on1 123 TGGT AT CAGAGCCAAT CGGCT GGT GGCT GGC GACGGG ----- CT AAACCCT AGCCT CGCCGGAG
Go-on2 123 TGGT AT CAGAGCCAAT CGGCT GG GGCT GGC GACGGGGC GACGGCT AAACCCT AGCCT CGCCGGAG
Go-on3 123 TGGT AT CAGAGCCAAT CGGCT GGT GGCT GGC GACGGGGC GACGGCT AAACCCT AGCCT CGCCGGAG
clone1 123 TGGT AT CAGAGCCAAT CGGCT GGT GGCT GGC GACGGGGC GACGGCT AAACCCT AGCCT CGCCGGAG
clone2 123 TGGT AT CAGAGCCAAT CGGCT GGT GGCT GGC GACGGGGC GACGGCT AAACCCT AGCCT CGCCGGAG
clone3 123 TGGT AT CAGAGCCAAT CGGCT GGT GGCT GGC GACGGGGC GACGGCT AAACCCT AGCCT CGCCGGAG
clone4 123 TGGT AT CAGAGCCAAT CGGCT GGT GGCT GGC GACGGGGC GACGGCT AAACCCT AGCCT CGCCGGAG
clone5 123 TGGT AT CAGAGCCAAT CGGCT GGT GGCT GGC GACGGGGC GACGGCT AAACCCT AGCCT CGCCGGAG

```

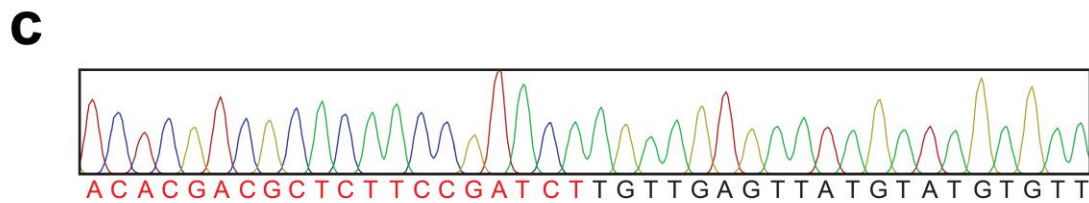

29

30 **Supplementary Figure 6. *Go-on* retrotransposon family**

31 **a**, Schematic structure of *Go-on* retrotransposons. The genomic coordinates and LTR  
32 similarities of each copy are shown at the left and right, respectively. Red boxes, ORFs;  
33 green boxes, regions encoding protein domains; blue boxes, PBS; white arrowheads, LTRs.  
34 Note that the sequences of the upstream LTRs through the PBS are identical in all three  
35 copies. The sequence variation specific for each element is indicated. Protein domains were  
36 predicted by NCBI BLASTP tool (<https://blast.ncbi.nlm.nih.gov/Blast.cgi>). Nucleotide  
37 positions indicating the start and end of ORF and protein domains are provided. Primers  
38 used for sequencing and qPCR analyses are shown as arrows. **b**, Multiple sequence  
39 alignment of the genomic sequences of three *Go-on* copies and the sequenced ALE clones.  
40 ALE-seq was performed using the RT primer specific to *Go-on3* indicated as "a" in **a**. The

41 resulting single-stranded first strand cDNA was PCR-amplified, cloned to the pGEM T-easy  
42 vector, and sequenced. Multiple sequence alignment was performed by ClustalW  
43 (<http://www.genome.jp/tools-bin/clustalw>) and visualized by boxshade tools  
44 ([https://www.ch.embnet.org/software/BOX\\_form.html](https://www.ch.embnet.org/software/BOX_form.html)). **c**, Sequencing of the ALE-seq  
45 product of *Go-on3* showing the junction region of the adapter and LTR. Sequences in red  
46 and black are the adapter and *Go-on* LTR, respectively.

47

**a**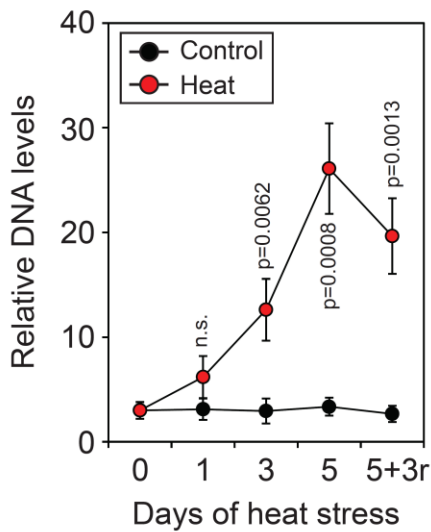**b**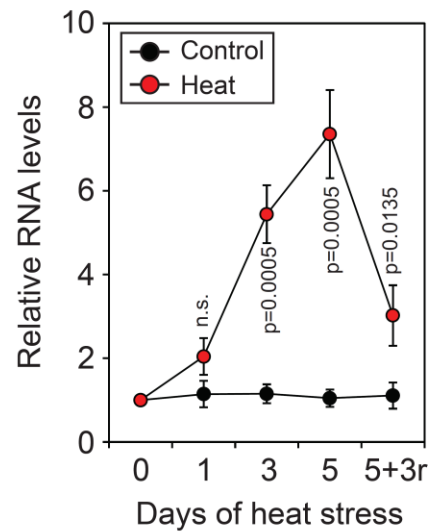**c**

5' -TGTTGAGTTATGTATGTGTTGGCCCATGAGGCCCATATACTAC  
 1 10 20 30 40  
 TCATATGTACATGTATATAGCAGAGTTAGAGAAATGAAAAAGTAG  
 50 60 70 80  
 TGAAGCTTCTAGAGAAAAATTCCCAAAC TTCATGGTATCAGAGC - 3'  
 90 100 110 120 130 134

48

49 **Supplementary Figure 7.** Heat stress-triggered transcriptional activation of *Go-on*

50 **a** and **b**, The relative levels of DNA (**a**) and RNA (**b**) of *Go-on3* determined by qPCR. Heat  
 51 treatment (44°C) was applied to 1-week-old rice seedlings for the periods indicated; +3r  
 52 means 3 days of recovery in normal growth conditions after heat stress. The levels are  
 53 means  $\pm$  sd of three biological replicates. For DNA analysis, Day 0 levels are set to 3,  
 54 reflecting three genomic copies of *Go-on* in *japonica* rice. Normalization was done against  
 55 *eEF1 $\alpha$* . P-values were calculated by a two-tailed Student's t-test; n.s., not significant. **c**, The  
 56 sequence of the left LTR and PBS of *Go-on3*. The sequence in red is the heat-related HSFC1-  
 57 binding sequence motif predicted by PlantPan 2.0 tool  
 58 (<http://plantpan2.itps.ncku.edu.tw/index.html>) with statistically significant enrichment of  
 59  $P= 4.28e^{-10}$  as determined by Fisher's exact test. The enrichment of the sequence motif was



60 calculated by comparing the ten most similar sequences of *Go-on* found in rice genome with  
61 1,000 random genomic loci of 150bp. The PBS is shown in blue.

62

**a**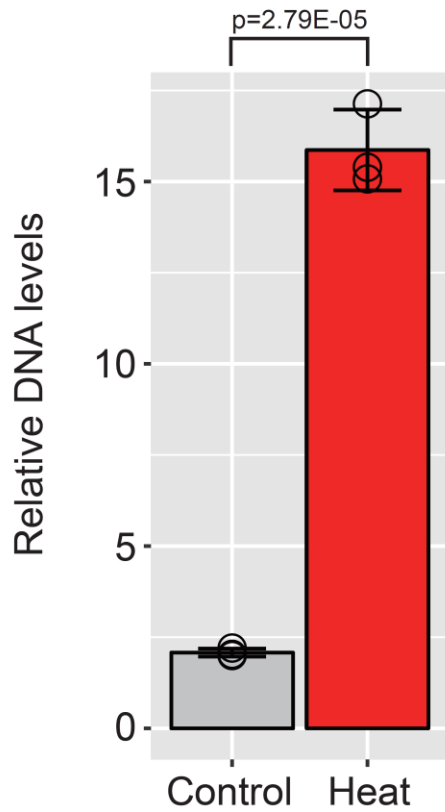**b**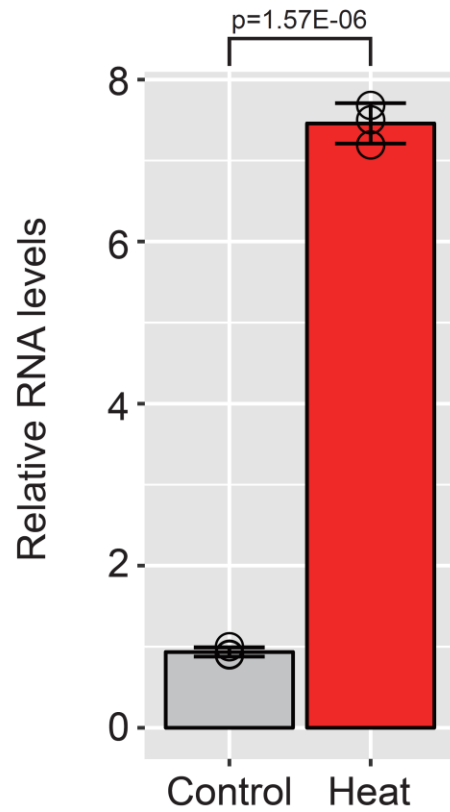

63

64 **Supplementary Figure 8.** Heat stress-triggered activation of *Go-on* in *indica* rice

65 **a** and **b**, The qPCR analyses for DNA (**a**) and RNA (**b**) levels of *Go-on* in *indica* rice. The levels  
66 are means  $\pm$  sd of three biological replications. The levels of control sample are set to 2 (**a**)  
67 reflecting 2 genomic copies of *Go-on* in *indica* rice. P-values are determined by two-sided  
68 Student's t-test.

69

**a**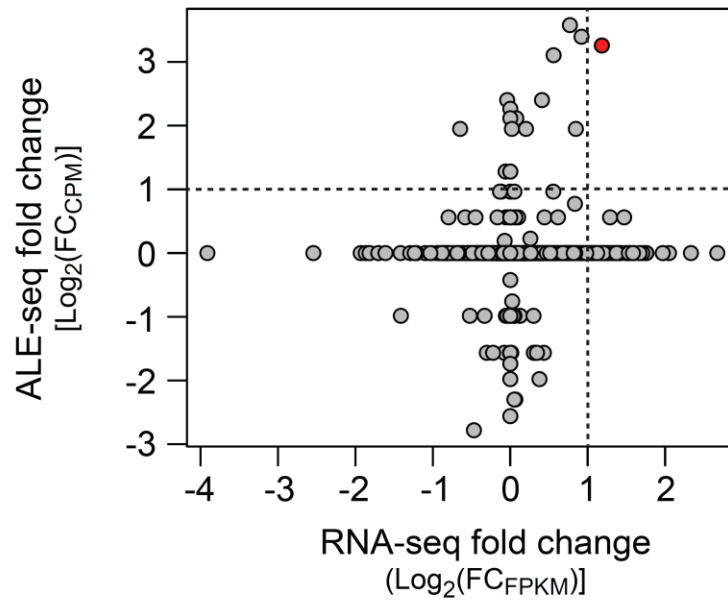**b**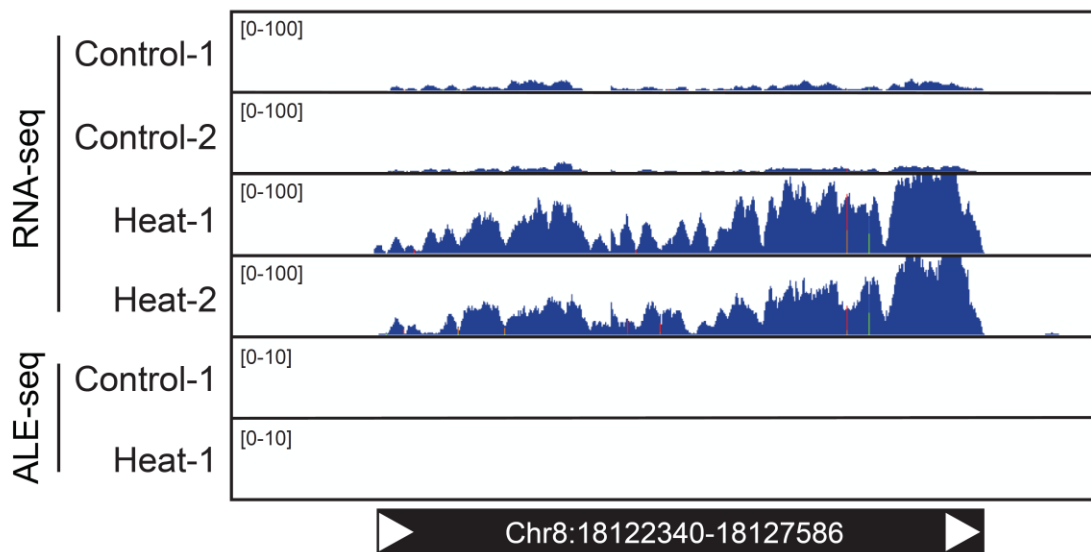

70

71 **Supplementary Figure 9.** Comparison of mRNA and ecdNA levels

72 **a**, Scatter plot for log<sub>2</sub>-fold changes (FCs) in RNA-seq and ALE-seq profiles in the control and  
 73 heat-stressed rice plants used in Figure 3. FCs were calculated by dividing heat samples  
 74 values by control samples values of CPM (counts per million reads) and FPKM (fragments  
 75 per kb per million reads) for ALE-seq and RNA-seq data, respectively. Each dot represents an

76 individual retroelement and the dashed lines mark log<sub>2</sub>-FC one. The retrotransposon in red  
77 has log<sub>2</sub>-FC higher than one in both ALE-seq and RNA-seq. **b**, Read coverage plot for a  
78 selected retrotransposon showing evidence of transcriptional activation upon heat stress  
79 not followed by synthesis of ecdNAs.

80

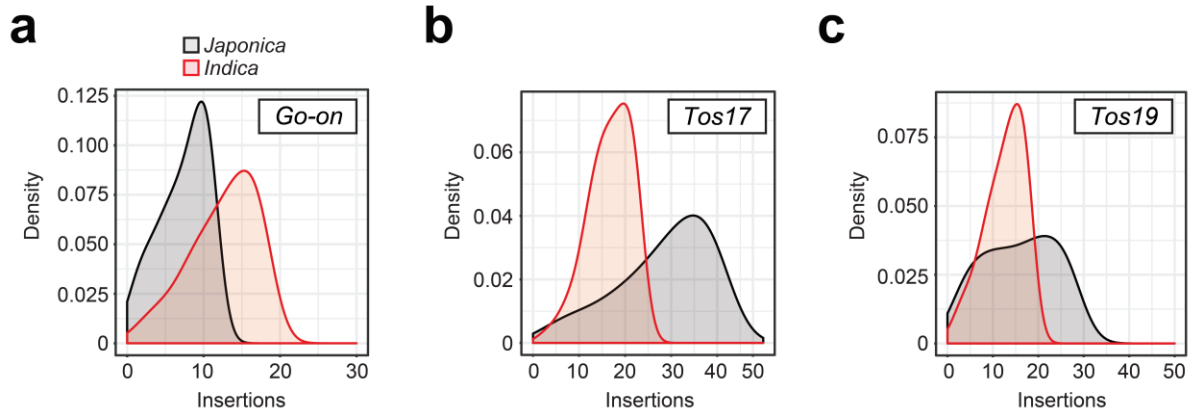

81

82 **Supplementary Figure 10.** Retrotransposon insertions in *japonica* and *indica* rice

83 **a-c**, Density plots for number of non-reference insertions in randomly selected 200  
 84 accessions out of 388 iterated by 1,000 times.

85

**a**

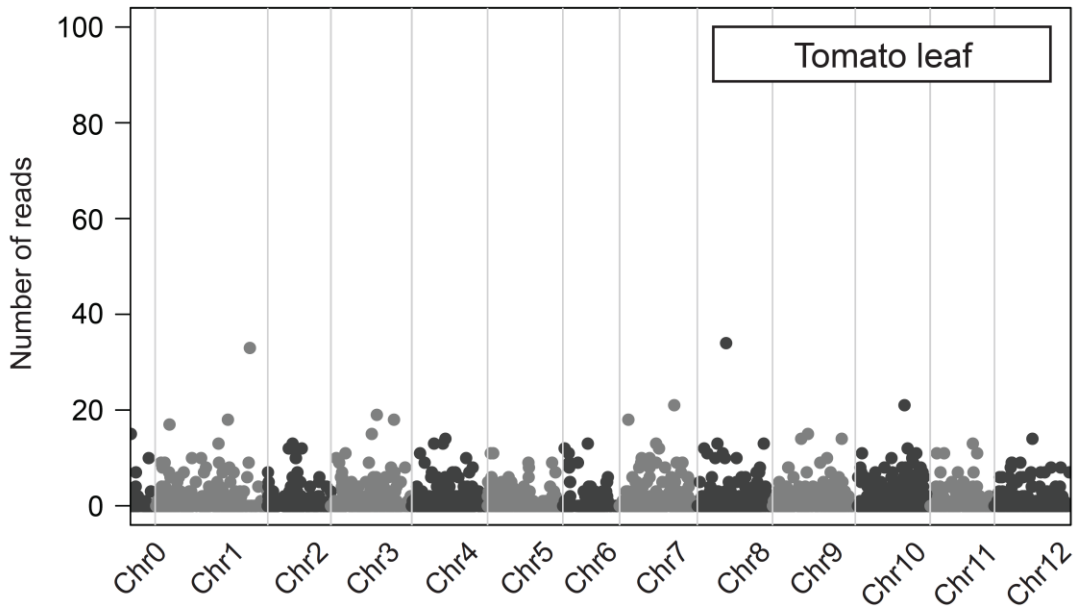

**b**

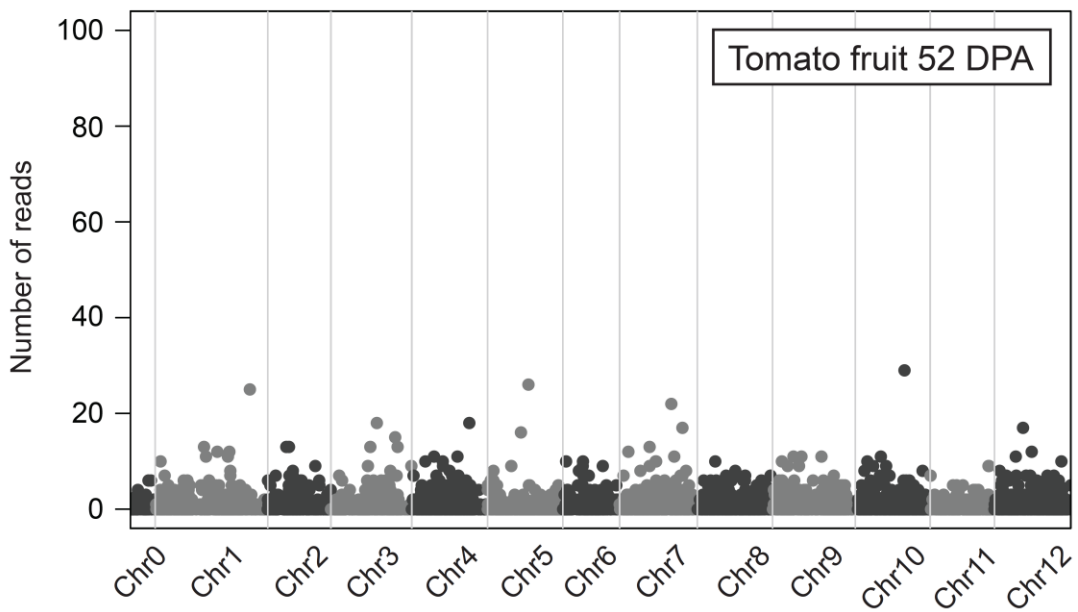

86

87 **Supplementary Figure 11.** ALE-seq profile of tomato leaves and fruits

88 **a** and **b**, Genome-wide plots for ALE-seq profiles performed in tomato leaves (**a**) and fruits  
89 52 DPA (**b**). Each dot represents an individual retrotransposon.

90

91 **Supplementary Table 1.** Sequences of oligonucleotides used in this study

92 T7 promoter sequence is underlined and in bold is partial Illumina adapter sequence.

| Primer                      | Sequence (5' → 3')                                            |
|-----------------------------|---------------------------------------------------------------|
| ALE adapter top strand      | AGAGAGT <u>AATACGACTCACTATAGGG</u> <b>ACACGACGCTCTCCGATCT</b> |
| ALE adapter bottom strand   | <b>AGATCGGAAGAGCGTCGTGT</b> <u>CCCTATAGTGAGTCGTATTACTCTCT</u> |
| ALE RT Met-iCAT-R           | AGACGTGTGCTCTCCGATCTGCTCTGATACCA                              |
| ALE RT Arg-CCT-R            | AGACGTGTGCTCTCCGATCTCCTGGCGCGCCA                              |
| ONSEN full length-F         | TGTTGAAAGTTAACTTGATTTTG                                       |
| ONSEN full length-R         | TGTTAGAGTAAAATTCTTTTAG                                        |
| Go-on-F (b of Figure S5)    | GGCAGAATACAGGGCAATGTC                                         |
| Go-on-R (c of Figure S5)    | GCCGACTTATTGTCACACCAC                                         |
| Go-on RT-R (a of Figure S5) | TCTCTGCACGCCTCGACAAG                                          |
| eEF1 $\alpha$ -F            | GCACGCTCTTCTTGCTTTCACTCT                                      |
| eEF1 $\alpha$ -R            | AAAGGTCACCACCATAACCAGGCTT                                     |
| FIRE RT-F                   | GAGTTGGCTACGTATCGTTTGC                                        |
| FIRE RT-R                   | AGCTCCACAAATTCATCCCAT                                         |
| FIRE copy number-F          | GGTGTCTCGTTGTGGTAAGT                                          |
| FIRE copy number-R          | TAAGGTGACACTCCCTCATAGT                                        |
| SICAC-F                     | CCTCCGTTGTGATGTAAGTGG                                         |
| SICAC-R                     | ATTGGTGGAAAGTAACATCATCG                                       |
| SIGAPDH-F                   | ATGCTCCCATGTTTGTGGGTG                                         |
| SIGAPDH-R                   | TTAGCAAAGGTGCAAGGCAGTTC                                       |

94 **Supplementary Table 2.** Summary of ALE-seq libraries

95 Numbers of reads sequenced and mapped are summarised. Both unique-mappers and  
 96 multi-mappers are considered. “% mapped to LTRs” refers to all reads mapped throughout  
 97 retrotransposon.

| <b>Samples</b>            | <b>Reads sequenced</b> | <b>% mapped to genome</b> | <b>% mapped to LTRs</b> | <b>% not mapped to LTRs</b> | <b>Accession number</b> |
|---------------------------|------------------------|---------------------------|-------------------------|-----------------------------|-------------------------|
| Arabidopsis Col-0         | 56,057                 | 93.20                     | 17.77                   | 75.43                       | SAMN09748167            |
| Arabidopsis heat-stressed | 45,554                 | 90.33                     | 15.85                   | 74.48                       | SAMN09748168            |
| Arabidopsis <i>met1-1</i> | 58,029                 | 94.79                     | 16.03                   | 78.76                       | SAMN09748169            |
| Arabidopsis epi12         | 45,545                 | 96.19                     | 31.18                   | 65.01                       | SAMN09748170            |
| Rice leaf                 | 27,063                 | 97.54                     | 12.33                   | 85.21                       | SAMN09748171            |
| Rice callus               | 25,183                 | 95.67                     | 13.58                   | 82.09                       | SAMN09748172            |
| Rice callus -Lig          | 37,610                 | 83.48                     | 11.75                   | 71.73                       | SAMN09748173            |
| Rice callus -T7           | 870                    | 2.82                      | 0.12                    | 2.70                        | SAMN09748174            |
| Rice callus -RT           | 516                    | 1.26                      | 0                       | 1.26                        | SAMN09748175            |
| Rice callus pooled PBS    | 22,939                 | 90.06                     | 14.16                   | 75.90                       | SAMN09748176            |
| Rice non-stressed         | 31,819                 | 90.39                     | 12.29                   | 78.10                       | SAMN09748177            |
| Rice heat-stressed        | 31,525                 | 97.63                     | 13.54                   | 84.09                       | SAMN09748178            |
| Tomato leaf               | 46,421                 | 96.65                     | 13.24                   | 83.41                       | SAMN09748179            |
| Tomato fruit 52 DPA       | 73,067                 | 96.97                     | 28.53                   | 68.44                       | SAMN09748180            |

98



99 **Supplementary Table 3.** Non-reference insertions of *Go-on*.

100 Neo-insertions of *Go-on* detected by TIF. The positions are provided as coordinates of target  
 101 site duplication.

| Chromosome | Start    | End      | Accession | Category      |
|------------|----------|----------|-----------|---------------|
| Chr4       | 31968290 | 31968294 | ERS467756 | <i>Indica</i> |
| Chr4       | 31968290 | 31968294 | ERS467757 | <i>Indica</i> |
| Chr1       | 43029985 | 43029989 | ERS467791 | <i>Indica</i> |
| Chr4       | 31968290 | 31968294 | ERS467794 | <i>Indica</i> |
| Chr4       | 31968290 | 31968294 | ERS467830 | <i>indica</i> |
| Chr1       | 43029985 | 43029989 | ERS467831 | <i>indica</i> |
| Chr4       | 31968290 | 31968294 | ERS467831 | <i>indica</i> |
| Chr7       | 29937784 | 29937788 | ERS467843 | <i>indica</i> |
| Chr1       | 43029985 | 43029989 | ERS467872 | <i>indica</i> |
| Chr4       | 31968290 | 31968294 | ERS467876 | <i>indica</i> |
| Chr1       | 43029985 | 43029989 | ERS467877 | <i>indica</i> |
| Chr1       | 43029985 | 43029989 | ERS467878 | <i>indica</i> |
| Chr8       | 5518300  | 5518306  | ERS467878 | <i>indica</i> |
| Chr7       | 29937784 | 29937788 | ERS467880 | <i>indica</i> |
| Chr4       | 31968290 | 31968294 | ERS467883 | <i>indica</i> |
| Chr11      | 1485949  | 1485953  | ERS467910 | <i>indica</i> |
| Chr1       | 43029985 | 43029989 | ERS467915 | <i>indica</i> |
| Chr4       | 31968290 | 31968294 | ERS467924 | <i>indica</i> |
| Chr7       | 29937784 | 29937788 | ERS467925 | <i>indica</i> |
| Chr4       | 31968290 | 31968294 | ERS467926 | <i>indica</i> |
| Chr1       | 20049396 | 20049400 | ERS467927 | <i>indica</i> |
| Chr8       | 5518300  | 5518306  | ERS467934 | <i>indica</i> |
| Chr1       | 43029985 | 43029989 | ERS467938 | <i>indica</i> |
| Chr1       | 20049396 | 20049400 | ERS467943 | <i>indica</i> |
| Chr8       | 3790507  | 3790511  | ERS467943 | <i>indica</i> |
| Chr1       | 20049396 | 20049400 | ERS467944 | <i>indica</i> |
| Chr4       | 31960603 | 31960607 | ERS467952 | <i>indica</i> |
| Chr8       | 5518300  | 5518306  | ERS467952 | <i>indica</i> |
| Chr8       | 5518300  | 5518306  | ERS467959 | <i>indica</i> |
| Chr1       | 20049396 | 20049400 | ERS467960 | <i>indica</i> |
| Chr1       | 43029985 | 43029989 | ERS467961 | <i>indica</i> |
| Chr1       | 20049396 | 20049400 | ERS467962 | <i>indica</i> |
| Chr4       | 13737528 | 13737532 | ERS467962 | <i>indica</i> |
| Chr7       | 29937784 | 29937788 | ERS467962 | <i>indica</i> |
| Chr1       | 43029985 | 43029989 | ERS467966 | <i>indica</i> |
| Chr1       | 43029985 | 43029989 | ERS467969 | <i>indica</i> |
| Chr4       | 31968290 | 31968294 | ERS467969 | <i>indica</i> |
| Chr1       | 43029985 | 43029989 | ERS467979 | <i>indica</i> |
| Chr8       | 5518300  | 5518306  | ERS467980 | <i>indica</i> |
| Chr1       | 43029985 | 43029989 | ERS467986 | <i>indica</i> |
| Chr4       | 31968290 | 31968294 | ERS467995 | <i>indica</i> |
| Chr7       | 29937784 | 29937788 | ERS467995 | <i>indica</i> |
| Chr12      | 16846383 | 16846387 | ERS467996 | <i>indica</i> |
| Chr4       | 31968290 | 31968294 | ERS467996 | <i>indica</i> |
| Chr8       | 5518300  | 5518306  | ERS467996 | <i>indica</i> |
| Chr5       | 287377   | 287381   | ERS467998 | <i>indica</i> |
| Chr1       | 43029985 | 43029989 | ERS467999 | <i>indica</i> |
| Chr8       | 3790507  | 3790511  | ERS468001 | <i>indica</i> |
| Chr1       | 20049396 | 20049400 | ERS468004 | <i>indica</i> |
| Chr8       | 5518300  | 5518306  | ERS468004 | <i>indica</i> |
| Chr1       | 20049396 | 20049400 | ERS468006 | <i>indica</i> |
| Chr8       | 5518300  | 5518306  | ERS468006 | <i>indica</i> |
| Chr4       | 31960603 | 31960607 | ERS468008 | <i>indica</i> |
| Chr7       | 29937784 | 29937788 | ERS468011 | <i>indica</i> |

|       |          |          |           |               |
|-------|----------|----------|-----------|---------------|
| Chr8  | 5518300  | 5518306  | ERS468011 | <i>indica</i> |
| Chr1  | 43029985 | 43029989 | ERS468014 | <i>indica</i> |
| Chr12 | 16846383 | 16846387 | ERS468016 | <i>indica</i> |
| Chr4  | 31960603 | 31960607 | ERS468018 | <i>indica</i> |
| Chr1  | 43029985 | 43029989 | ERS468023 | <i>indica</i> |
| Chr1  | 43029985 | 43029989 | ERS468025 | <i>indica</i> |
| Chr8  | 5518299  | 5518306  | ERS468028 | <i>indica</i> |
| Chr1  | 43029985 | 43029989 | ERS468029 | <i>indica</i> |
| Chr4  | 31968290 | 31968294 | ERS468042 | <i>indica</i> |
| Chr7  | 29937784 | 29937788 | ERS468048 | <i>indica</i> |
| Chr1  | 43029985 | 43029989 | ERS468049 | <i>indica</i> |
| Chr8  | 5518300  | 5518306  | ERS468050 | <i>indica</i> |
| Chr1  | 43029985 | 43029989 | ERS468052 | <i>indica</i> |
| Chr8  | 5518300  | 5518306  | ERS468053 | <i>indica</i> |
| Chr4  | 13737528 | 13737532 | ERS468055 | <i>indica</i> |
| Chr8  | 5518300  | 5518306  | ERS468055 | <i>indica</i> |
| Chr7  | 29937784 | 29937788 | ERS468059 | <i>indica</i> |
| Chr7  | 29937784 | 29937788 | ERS468060 | <i>indica</i> |
| Chr6  | 31319589 | 31319593 | ERS468065 | <i>indica</i> |
| Chr1  | 43029985 | 43029989 | ERS468066 | <i>indica</i> |
| Chr4  | 13737528 | 13737532 | ERS468068 | <i>indica</i> |
| Chr8  | 5518300  | 5518306  | ERS468071 | <i>indica</i> |
| Chr1  | 20049396 | 20049400 | ERS468072 | <i>indica</i> |
| Chr7  | 29937784 | 29937788 | ERS468073 | <i>indica</i> |
| Chr4  | 31968290 | 31968294 | ERS468074 | <i>indica</i> |
| Chr4  | 31960603 | 31960607 | ERS468075 | <i>indica</i> |
| Chr12 | 16846383 | 16846387 | ERS468077 | <i>indica</i> |
| Chr1  | 20049396 | 20049400 | ERS468078 | <i>indica</i> |
| Chr8  | 5518300  | 5518306  | ERS468084 | <i>indica</i> |
| Chr11 | 29783248 | 29783252 | ERS468086 | <i>indica</i> |
| Chr1  | 20049396 | 20049400 | ERS468087 | <i>indica</i> |
| Chr1  | 20049396 | 20049400 | ERS468088 | <i>indica</i> |
| Chr8  | 5518300  | 5518306  | ERS468088 | <i>indica</i> |
| Chr8  | 5518300  | 5518306  | ERS468089 | <i>indica</i> |
| Chr12 | 22672020 | 22672024 | ERS468095 | <i>indica</i> |
| Chr4  | 31960603 | 31960607 | ERS468101 | <i>indica</i> |
| Chr1  | 43029985 | 43029989 | ERS468102 | <i>indica</i> |
| Chr1  | 43029985 | 43029989 | ERS468104 | <i>indica</i> |
| Chr4  | 31968290 | 31968294 | ERS468106 | <i>indica</i> |
| Chr12 | 16846383 | 16846387 | ERS468111 | <i>indica</i> |
| Chr1  | 43029985 | 43029989 | ERS468112 | <i>indica</i> |
| Chr1  | 43029985 | 43029989 | ERS468115 | <i>indica</i> |
| Chr8  | 5518300  | 5518306  | ERS468121 | <i>indica</i> |
| Chr4  | 31968290 | 31968294 | ERS468126 | <i>indica</i> |
| Chr8  | 5518300  | 5518306  | ERS468131 | <i>indica</i> |
| Chr8  | 5518300  | 5518306  | ERS468133 | <i>indica</i> |
| Chr1  | 20049396 | 20049400 | ERS468134 | <i>indica</i> |
| Chr4  | 31968290 | 31968294 | ERS468136 | <i>indica</i> |
| Chr1  | 43029985 | 43029989 | ERS468138 | <i>indica</i> |
| Chr4  | 31968290 | 31968294 | ERS468139 | <i>indica</i> |
| Chr8  | 5518300  | 5518306  | ERS468142 | <i>indica</i> |
| Chr4  | 31968290 | 31968294 | ERS468154 | <i>indica</i> |
| Chr4  | 31968290 | 31968294 | ERS468157 | <i>indica</i> |
| Chr1  | 43029985 | 43029989 | ERS468160 | <i>indica</i> |
| Chr1  | 43029985 | 43029989 | ERS468161 | <i>indica</i> |
| Chr4  | 31968290 | 31968294 | ERS468163 | <i>indica</i> |
| Chr1  | 20049396 | 20049400 | ERS468166 | <i>indica</i> |
| Chr4  | 31968290 | 31968294 | ERS468169 | <i>indica</i> |
| Chr5  | 19524953 | 19524957 | ERS468170 | <i>indica</i> |
| Chr4  | 31968290 | 31968294 | ERS468174 | <i>indica</i> |
| Chr8  | 5518300  | 5518306  | ERS468184 | <i>indica</i> |

|       |          |          |           |                 |
|-------|----------|----------|-----------|-----------------|
| Chr8  | 5518300  | 5518306  | ERS468186 | <i>indica</i>   |
| Chr4  | 31968290 | 31968294 | ERS468187 | <i>indica</i>   |
| Chr8  | 5518300  | 5518306  | ERS468187 | <i>indica</i>   |
| Chr4  | 31968290 | 31968294 | ERS468191 | <i>indica</i>   |
| Chr4  | 31968290 | 31968294 | ERS468192 | <i>indica</i>   |
| Chr4  | 31968290 | 31968294 | ERS468193 | <i>indica</i>   |
| Chr8  | 5518300  | 5518306  | ERS468195 | <i>indica</i>   |
| Chr4  | 31968290 | 31968294 | ERS468202 | <i>indica</i>   |
| Chr7  | 29937784 | 29937788 | ERS468202 | <i>indica</i>   |
| Chr4  | 31968290 | 31968294 | ERS468204 | <i>indica</i>   |
| Chr4  | 31968290 | 31968294 | ERS468205 | <i>indica</i>   |
| Chr8  | 5518300  | 5518306  | ERS468207 | <i>indica</i>   |
| Chr8  | 5518300  | 5518306  | ERS468209 | <i>indica</i>   |
| Chr7  | 29937784 | 29937788 | ERS468210 | <i>indica</i>   |
| Chr11 | 30168035 | 30168039 | ERS468212 | <i>indica</i>   |
| Chr5  | 287377   | 287381   | ERS468212 | <i>indica</i>   |
| Chr1  | 43029985 | 43029989 | ERS468215 | <i>indica</i>   |
| Chr4  | 31968290 | 31968294 | ERS468222 | <i>indica</i>   |
| Chr4  | 31968290 | 31968294 | ERS468230 | <i>indica</i>   |
| Chr4  | 31968290 | 31968294 | ERS468232 | <i>indica</i>   |
| Chr4  | 31968290 | 31968294 | ERS468234 | <i>indica</i>   |
| Chr1  | 43029985 | 43029989 | ERS468237 | <i>indica</i>   |
| Chr4  | 13737528 | 13737532 | ERS468240 | <i>indica</i>   |
| Chr7  | 29937784 | 29937788 | ERS468249 | <i>indica</i>   |
| Chr1  | 43029985 | 43029989 | ERS468250 | <i>indica</i>   |
| Chr3  | 431859   | 431863   | ERS468252 | <i>indica</i>   |
| Chr7  | 29937784 | 29937788 | ERS468252 | <i>indica</i>   |
| Chr11 | 29783248 | 29783252 | ERS468255 | <i>indica</i>   |
| Chr1  | 19257271 | 19257275 | ERS467801 | <i>japonica</i> |
| Chr5  | 23638163 | 23638167 | ERS467889 | <i>japonica</i> |
| Chr11 | 1514174  | 1514178  | ERS467893 | <i>japonica</i> |
| Chr8  | 5635769  | 5635774  | ERS467904 | <i>japonica</i> |
| Chr11 | 1514174  | 1514178  | ERS468026 | <i>japonica</i> |
| Chr5  | 258622   | 258626   | ERS468308 | <i>japonica</i> |
| Chr8  | 5635768  | 5635774  | ERS468310 | <i>japonica</i> |
| Chr1  | 41968356 | 41968360 | ERS468380 | <i>japonica</i> |
| Chr8  | 5635768  | 5635774  | ERS468383 | <i>japonica</i> |
| Chr8  | 5635768  | 5635774  | ERS468384 | <i>japonica</i> |
| Chr8  | 5635768  | 5635774  | ERS468387 | <i>japonica</i> |
| Chr8  | 5635768  | 5635774  | ERS468402 | <i>japonica</i> |
| Chr6  | 24954457 | 24954461 | ERS468442 | <i>japonica</i> |
| Chr6  | 22413483 | 22413487 | ERS468446 | <i>japonica</i> |
| Chr7  | 29379081 | 29379085 | ERS468449 | <i>japonica</i> |
| Chr8  | 5635769  | 5635774  | ERS468449 | <i>japonica</i> |
| Chr8  | 5635768  | 5635774  | ERS468456 | <i>japonica</i> |
| Chr8  | 5635768  | 5635774  | ERS468458 | <i>japonica</i> |
| Chr8  | 5635769  | 5635774  | ERS468595 | <i>japonica</i> |
| Chr8  | 5635768  | 5635774  | ERS468596 | <i>japonica</i> |
| Chr8  | 5635768  | 5635774  | ERS468604 | <i>japonica</i> |
| Chr8  | 5635768  | 5635774  | ERS468613 | <i>japonica</i> |
| Chr8  | 5635768  | 5635775  | ERS468617 | <i>japonica</i> |
| Chr8  | 5635768  | 5635774  | ERS468620 | <i>japonica</i> |
| Chr6  | 22413483 | 22413487 | ERS468649 | <i>japonica</i> |
| Chr5  | 258622   | 258626   | ERS468684 | <i>japonica</i> |
| Chr7  | 29379081 | 29379085 | ERS468704 | <i>japonica</i> |
| Chr8  | 5635768  | 5635774  | ERS468705 | <i>japonica</i> |
| Chr5  | 258622   | 258626   | ERS468721 | <i>japonica</i> |
| Chr5  | 23638163 | 23638167 | ERS468734 | <i>japonica</i> |
| Chr1  | 41968356 | 41968360 | ERS468902 | <i>japonica</i> |
| Chr1  | 41968356 | 41968360 | ERS468917 | <i>japonica</i> |
| Chr8  | 5635769  | 5635774  | ERS468993 | <i>japonica</i> |

|      |         |         |           |                 |
|------|---------|---------|-----------|-----------------|
| Chr2 | 1659944 | 1659948 | ERS469049 | <i>japonica</i> |
| Chr8 | 5635768 | 5635774 | ERS469069 | <i>japonica</i> |
| Chr8 | 5635768 | 5635774 | ERS469132 | <i>japonica</i> |
| Chr8 | 5635768 | 5635774 | ERS469177 | <i>japonica</i> |
| Chr8 | 5635768 | 5635774 | ERS469199 | <i>japonica</i> |
| Chr8 | 5635768 | 5635774 | ERS469215 | <i>japonica</i> |
| Chr8 | 5635768 | 5635774 | ERS469302 | <i>japonica</i> |
| Chr8 | 5635768 | 5635774 | ERS469307 | <i>japonica</i> |
| Chr8 | 5635768 | 5635774 | ERS469556 | <i>japonica</i> |
| Chr8 | 5635768 | 5635774 | ERS469602 | <i>japonica</i> |
| Chr8 | 5635768 | 5635774 | ERS469604 | <i>japonica</i> |
| Chr8 | 5635768 | 5635774 | ERS469605 | <i>japonica</i> |
| Chr8 | 5635768 | 5635775 | ERS469637 | <i>japonica</i> |
| Chr8 | 5635768 | 5635774 | ERS469650 | <i>japonica</i> |
| Chr8 | 5635768 | 5635774 | ERS469668 | <i>japonica</i> |
| Chr8 | 5635768 | 5635774 | ERS469669 | <i>japonica</i> |
| Chr8 | 5635768 | 5635774 | ERS469689 | <i>japonica</i> |
| Chr8 | 5635768 | 5635774 | ERS469694 | <i>japonica</i> |
| Chr8 | 5635768 | 5635774 | ERS469696 | <i>japonica</i> |
| Chr8 | 5635768 | 5635774 | ERS469699 | <i>japonica</i> |
| Chr8 | 5635768 | 5635774 | ERS469746 | <i>japonica</i> |
| Chr8 | 5635768 | 5635774 | ERS469758 | <i>japonica</i> |
| Chr8 | 5635768 | 5635774 | ERS469845 | <i>japonica</i> |
| Chr8 | 5635768 | 5635774 | ERS469880 | <i>japonica</i> |
| Chr8 | 5635768 | 5635774 | ERS469978 | <i>japonica</i> |
| Chr8 | 5635768 | 5635774 | ERS469985 | <i>japonica</i> |
| Chr8 | 5635768 | 5635774 | ERS470129 | <i>japonica</i> |
| Chr8 | 5635768 | 5635774 | ERS470132 | <i>japonica</i> |
| Chr8 | 5635768 | 5635774 | ERS470188 | <i>japonica</i> |
| Chr8 | 5635768 | 5635774 | ERS470344 | <i>japonica</i> |
| Chr8 | 5635768 | 5635774 | ERS470439 | <i>japonica</i> |
| Chr8 | 5635768 | 5635774 | ERS470516 | <i>japonica</i> |

---
